# Supplementary material
Source: publisher figshare collection journal article supplement (https://tandf.figshare.com/articles/dataset/_/16635354)
Supplement: Supplementary file 2 [file 1]

## Supplementary Online File 1

List of trace fossil and rock sample specimens from the Torneträsk Formation in the Lake Torneträsk area, Lappland, Sweden, held in the collections of the Swedish Museum of Natural History.

| Catalogue ID | Genus/Taxa                         | Locality  | Site and stratigraphic position                             | Age            | Collector       | Collection date    |
|--------------|------------------------------------|-----------|-------------------------------------------------------------|----------------|-----------------|--------------------|
| X00010161    | Rock sample.                       | Luobákte  | Lower siltstone interval                                    | Early Cambrian | Skovsted et al. | 2020-08-05, 07, 09 |
| X00010162a   | <i>Laevicyclus</i> isp.            | Luobákte  | Top of the lower siltstone interval                         | Early Cambrian | Skovsted et al. | 2020-08-05, 07, 09 |
| X00010162b   | cf. <i>Palaeophycus tubularis</i>  | Luobákte  | Top of the lower siltstone interval                         | Early Cambrian | Skovsted et al. | 2020-08-05, 07, 09 |
| X00010163    | cf. <i>Palaeophycus tubularis</i>  | Luobákte  | Top of the lower siltstone interval                         | Early Cambrian | Skovsted et al. | 2020-08-05, 07, 09 |
| X00010164a   | <i>Treptichnus pedum</i>           | Luobákte  | Top of the lower siltstone interval                         | Early Cambrian | Skovsted et al. | 2020-08-05, 07, 09 |
| X00010164b   | <i>Archaeonassa</i> isp.           | Luobákte  | Top of the lower siltstone interval                         | Early Cambrian | Skovsted et al. | 2020-08-05, 07, 09 |
| X00010164c   | <i>Bergaueria perata</i>           | Luobákte  | Top of the lower siltstone interval                         | Early Cambrian | Skovsted et al. | 2020-08-05, 07, 09 |
| X00010165    | <i>Treptichnus pedum</i>           | Luobákte  | Top of the lower siltstone interval                         | Early Cambrian | Skovsted et al. | 2020-08-05, 07, 09 |
| X00010166a   | <i>Planolites montanus</i>         | Luobákte  | Top of the lower siltstone interval                         | Early Cambrian | Skovsted et al. | 2020-08-05, 07, 09 |
| X00010166a   | cf. <i>Palaeophycus tubularis</i>  | Luobákte  | Top of the lower siltstone interval                         | Early Cambrian | Skovsted et al. | 2020-08-05, 07, 09 |
| X00010167    | <i>Treptichnus pedum</i>           | Luobákte  | Top of the lower siltstone interval                         | Early Cambrian | Skovsted et al. | 2020-08-05, 07, 09 |
| X00010168a   | <i>Treptichnus pedum</i>           | Luobákte  | Top of the lower siltstone interval                         | Early Cambrian | Skovsted et al. | 2020-08-05, 07, 09 |
| X00010168b   | <i>Bergaueria perata</i>           | Luobákte  | Top of the lower siltstone interval                         | Early Cambrian | Skovsted et al. | 2020-08-05, 07, 09 |
| X00010169    | <i>Planolites montanus</i>         | Luobákte  | Top of the lower siltstone interval                         | Early Cambrian | Skovsted et al. | 2020-08-05, 07, 09 |
| X00010170a   | <i>Treptichnus pedum</i>           | Luobákte  | Top of the lower siltstone interval                         | Early Cambrian | Skovsted et al. | 2020-08-05, 07, 09 |
| X00010170b   | <i>Planolites montanus</i>         | Luobákte  | Top of the lower siltstone interval                         | Early Cambrian | Skovsted et al. | 2020-08-05, 07, 09 |
| X00010171a   | Bacterial mats (wrinkle structure) | Vakkejokk | upper sandstone, lower part below 4 <sup>th</sup> waterfall | Early Cambrian | McLoughlin, S.  | 2020-08-06         |
| X00010171b   | Bacterial mats (wrinkle structure) | Vakkejokk | upper sandstone, lower part below 4 <sup>th</sup> waterfall | Early Cambrian | McLoughlin, S.  | 2020-08-06         |
| X00010172    | <i>Archaeonassa</i> isp.           | Luobákte  | Top of the lower siltstone interval                         | Early Cambrian | Skovsted et al. | 2020-08-05, 07, 09 |
| X00010173a   | <i>Treptichnus pedum</i>           | Luobákte  | Top of the lower siltstone interval                         | Early Cambrian | Skovsted et al. | 2020-08-05, 07, 09 |
| X00010173b   | <i>Bergaueria perata</i>           | Luobákte  | Top of the lower siltstone interval                         | Early Cambrian | Skovsted et al. | 2020-08-05, 07, 09 |
| X00010173c   | <i>Planolites montanus</i>         | Luobákte  | Top of the lower siltstone interval                         | Early Cambrian | Skovsted et al. | 2020-08-05, 07, 09 |

|            |                                   |            |                                     |                |                 |                    |
|------------|-----------------------------------|------------|-------------------------------------|----------------|-----------------|--------------------|
| X00010174  | Large lobate grooved structure    | Luobákte   | Top of the lower siltstone interval | Early Cambrian | Skovsted et al. | 2020-08-05, 07, 09 |
| X00010175  | cf. <i>Palaeophycus tubularis</i> | Luobákte   | Top of the lower siltstone interval | Early Cambrian | Skovsted et al. | 2020-08-05, 07, 09 |
| X00010176  | <i>Treptichnus pedum</i>          | Luobákte   | Top of the lower siltstone interval | Early Cambrian | Skovsted et al. | 2020-08-05, 07, 09 |
| X00010177  | cf. <i>Palaeophycus tubularis</i> | Kaisepakte | Stream section unknown float        | Early Cambrian | Skovsted et al. | 2020-08-05, 07, 09 |
| X00010178  | cf. <i>Trichophycus venosus</i>   | Vakkejokk  | 1–4 Float below big waterfall       | Early Cambrian | McLoughlin, S.  | 2020-08-06         |
| X00010179  | <i>Planolites montanus</i>        | Luobákte   | Top of the lower siltstone interval | Early Cambrian | Skovsted et al. | 2020-08-05, 07, 09 |
| X00010180  | cf. <i>Palaeophycus tubularis</i> | Luobákte   | Top of the lower siltstone interval | Early Cambrian | Skovsted et al. | 2020-08-05, 07, 09 |
| X00010181a | <i>Palaeophycus</i> isp.          | Luobákte   | Top of the lower siltstone interval | Early Cambrian | Skovsted et al. | 2020-08-05, 07, 09 |
| X00010181b | cf. <i>Palaeophycus tubularis</i> | Luobákte   | Top of the lower siltstone interval | Early Cambrian | Skovsted et al. | 2020-08-05, 07, 09 |
| X00010182a | cf. <i>Trichophycus venosus</i>   | Luobákte   | Top of the lower siltstone interval | Early Cambrian | Skovsted et al. | 2020-08-05, 07, 09 |
| X00010182b | <i>Planolites montanus</i>        | Luobákte   | Top of the lower siltstone interval | Early Cambrian | Skovsted et al. | 2020-08-05, 07, 09 |
| X00010183a | <i>Bergaueria perata</i>          | Luobákte   | Top of the lower siltstone interval | Early Cambrian | Skovsted et al. | 2020-08-05, 07, 09 |
| X00010183b | <i>Treptichnus pedum</i>          | Luobákte   | Top of the lower siltstone interval | Early Cambrian | Skovsted et al. | 2020-08-05, 07, 09 |
| X00010184  | <i>Bergaueria</i> isp             | Luobákte   | Section 1 lower siltstone interval  | Early Cambrian | McLoughlin, S.  | 2020-08-05, 07, 09 |
| X00010184a | cf. <i>Palaeophycus tubularis</i> | Luobákte   | Section 1 lower siltstone interval  | Early Cambrian | McLoughlin, S.  | 2020-08-05, 07, 09 |
| X00010184b | cf. <i>Palaeophycus tubularis</i> | Luobákte   | Section 1 lower siltstone interval  | Early Cambrian | McLoughlin, S.  | 2020-08-05, 07, 09 |
| X00010185  | <i>Treptichnus pedum</i>          | Luobákte   | Top of the lower siltstone interval | Early Cambrian | Skovsted et al. | 2020-08-05, 07, 09 |
| X00010186a | cf. <i>Treptichnus</i> isp.       | Luobákte   | Top of the lower siltstone interval | Early Cambrian | Skovsted et al. | 2020-08-05, 07, 09 |
| X00010186b | <i>Treptichnus pedum</i>          | Luobákte   | Top of the lower siltstone interval | Early Cambrian | Skovsted et al. | 2020-08-05, 07, 09 |
| X00010187a | Semi-concentric traces            | Luobákte   | Top of the lower siltstone interval | Early Cambrian | Skovsted et al. | 2020-08-05, 07, 09 |
| X00010187b | <i>Planolites montanus</i>        | Luobákte   | Top of the lower siltstone interval | Early Cambrian | Skovsted et al. | 2020-08-05, 07, 09 |
| X00010187c | <i>Archaeonassa</i> isp.          | Luobákte   | Top of the lower siltstone interval | Early Cambrian | Skovsted et al. | 2020-08-05, 07, 09 |
| X00010188  | <i>Treptichnus pedum</i>          | Luobákte   | Section 1 lower siltstone interval  | Early Cambrian | McLoughlin, S.  | 2020-08-05, 07, 09 |
| X00010189a | <i>Bergaueria perata</i>          | Luobákte   | Section 1 lower siltstone interval  | Early Cambrian | McLoughlin, S.  | 2020-08-05, 07, 09 |
| X00010189b | <i>Treptichnus pedum</i>          | Luobákte   | Section 1 lower siltstone interval  | Early Cambrian | McLoughlin, S.  | 2020-08-05, 07, 09 |
| X00010190  | cf. <i>Teichichnus</i> isp.       | Luobákte   | Section 1 lower siltstone interval  | Early Cambrian | McLoughlin, S.  | 2020-08-05, 07, 09 |
| X00010191  | <i>Treptichnus pedum</i>          | Luobákte   | Top of the lower siltstone interval | Early Cambrian | Skovsted et al. | 2020-08-05, 07, 09 |
| X00010192  | <i>Treptichnus pedum</i>          | Luobákte   | Moberg's profile 2, layer 3         | Early Cambrian | Jan Bergström   | 1978-08-11         |
| X00010193  | <i>Archaeonassa</i> isp.          | Luobákte   | Moberg's profile 2, layer 3         | Early Cambrian | Jan Bergström   | 1978-08-11         |

|            |                                   |                            |                                                                     |                |                |            |
|------------|-----------------------------------|----------------------------|---------------------------------------------------------------------|----------------|----------------|------------|
| X00010194  | <i>Treptichnus pedum</i>          | Luobákte                   | "Medusa"-level                                                      | Early Cambrian | Jan Bergström  |            |
| X00010194a | <i>Treptichnus pedum</i>          | Luobákte                   | "Medusa"-level                                                      | Early Cambrian | Jan Bergström  |            |
| X00010195a | <i>Bergaueria perata</i>          | Luobákte                   | Lower siltstone, block                                              | Early Cambrian | Jan Bergström  | 1978-08-10 |
| X00010195a | cf. <i>Palaeophycus tubularis</i> | Luobákte                   | Lower siltstone, block                                              | Early Cambrian | Jan Bergström  | 1978-08-10 |
| X00010196  | <i>Treptichnus pedum</i>          | Luobákte                   | Moberg's profile 2, layer 2                                         | Early Cambrian | Jan Bergström  | 1978-08-11 |
| X00010197  | <i>Bergaueria perata</i>          | Luobákte                   | 1,2 m under middle sandstone                                        | Early Cambrian | Jonas Hagström |            |
| X00010197a | <i>Bergaueria perata</i>          | Luobákte                   | 1,2 m under middle sandstone                                        | Early Cambrian | Jonas Hagström |            |
| X00010198  | <i>Bergaueria perata</i>          | Luobákte                   | 1,2 m under middle sandstone                                        | Early Cambrian | Jonas Hagström |            |
| X00010199  | <i>Bergaueria perata</i>          | Luobákte                   | Moberg's profile 2, layer 2                                         | Early Cambrian | Jan Bergström  | 1978-08-11 |
| X00010200  | <i>Bergaueria perata</i>          | Luobákte                   | "Med.samvån?"                                                       | Early Cambrian | Jan Bergström  | 1978-08-10 |
| X00010201  | <i>Bergaueria perata</i>          | Luobákte                   | Moberg's profile 2, layer 7                                         | Early Cambrian | Jan Bergström  | 1978-08-10 |
| X00010202  | <i>Bergaueria perata</i>          | Luobákte                   | Moberg's profile 2, layer 7                                         | Early Cambrian | Jan Bergström  | 1978-08-10 |
| X00010203  | <i>Treptichnus pedum</i>          | Luobákte                   | Moberg's profile 2, layer 7                                         | Early Cambrian | Jan Bergström  | 1978-08-10 |
| X00010203a | <i>Treptichnus pedum</i>          | Luobákte                   | Moberg's profile 2, layer 7                                         | Early Cambrian | Jan Bergström  | 1978-08-10 |
| X00010204  | <i>Archaeonassa</i> isp.          | Luobákte                   | East c. 150 cm above channel                                        | Early Cambrian | Jan Bergström? |            |
| X00010205  | <i>Archaeonassa</i> isp.          | Luobákte                   | upper sandstone 270 cm from top                                     | Early Cambrian | Jan Bergström? |            |
| X00010206  | cf. <i>Protovirgularia</i> isp.   | Luobákte                   | East sandstone 150 cm from top                                      | Early Cambrian | Jan Bergström? |            |
| X00010207  | <i>Archaeonassa</i> isp.          | Luobákte                   | East sandstone c. 150 cm above large channel. Moberg's layer 18.    | Early Cambrian | Jan Bergström? |            |
| X00010208a | cf. <i>Palaeophycus tubularis</i> | Luobákte                   | Erratic                                                             | Early Cambrian | Jonas Hagström | 1987-01-01 |
| X00010208b | <i>Treptichnus pedum</i>          | Luobákte                   | Erratic                                                             | Early Cambrian | Jonas Hagström | 1987-01-01 |
| X00010208c | <i>Planolites montanus</i>        | Luobákte                   | Erratic                                                             | Early Cambrian | Jonas Hagström | 1987-01-01 |
| X00010209  | Sand-filled cracks                | Luobákte                   | Erratic                                                             | Early Cambrian | Jonas Hagström | 1987-01-01 |
| X00010210a | cf. <i>Palaeophycus tubularis</i> | Oscar Kulling's excavation | Layer under Vakkejokk Breccia; Tjäurajokk, north side of Torneträsk | Early Cambrian | Jan Bergström  | 1978-08-08 |
| X00010210b | <i>Treptichnus pedum</i>          | Oscar Kulling's excavation | Layer under Vakkejokk Breccia; Tjäurajokk, north side of Torneträsk | Early Cambrian | Jan Bergström  | 1978-08-08 |
| X00010210c | <i>Planolites montanus</i>        | Oscar Kulling's excavation | Layer under Vakkejokk Breccia; Tjäurajokk, north side of Torneträsk | Early Cambrian | Jan Bergström  | 1978-08-08 |
| X00010210d | Algae ('vendotaenids')            | Oscar Kulling's excavation | Layer under Vakkejokk Breccia; Tjäurajokk, north side of Torneträsk | Early Cambrian | Jan Bergström  | 1978-08-08 |
| X00010211a | Algae ('vendotaenids')            | Oscar Kulling's excavation | Siltstone under Vakkejokk Breccia; Tjäurajokk Quarry                | Early Cambrian | Jan Bergström  | 1978-08-09 |

|            |                                   |                            |                                                      |                |               |            |
|------------|-----------------------------------|----------------------------|------------------------------------------------------|----------------|---------------|------------|
| X00010211b | <i>Treptichnus pedum</i>          | Oscar Kulling's excavation | Siltstone under Vakkejokk Breccia; Tjäurajokk Quarry | Early Cambrian | Jan Bergström | 1978-08-09 |
| X00010212a | cf. <i>Protovirgularia</i> isp.   | Oscar Kulling's excavation | Under Vakkejokk Breccia, Tjäurajokk Quarry           | Early Cambrian | Jan Bergström | 1978-08-08 |
| X00010212b | <i>Treptichnus pedum</i>          | Oscar Kulling's excavation | Under Vakkejokk Breccia, Tjäurajokk                  | Early Cambrian | Jan Bergström | 1978-08-08 |
| X00010212c | <i>Planolites montanus</i>        | Oscar Kulling's excavation | Under Vakkejokk Breccia, Tjäurajokk                  | Early Cambrian | Jan Bergström | 1978-08-08 |
| X00010213  | Imbricate-ridged trace            | Oscar Kulling's excavation | Under Vakkejokk Breccia, Tjäurajokk                  | Early Cambrian | Jan Bergström | 1978-08-09 |
| X00010214  | <i>Treptichnus pedum</i>          | Oscar Kulling's excavation | Shale under Vakkejokk Breccia, Tjäurajokk            | Early Cambrian | Jan Bergström | 1978-08-09 |
| X00010215  | cf. <i>Palaeophycus tubularis</i> | Oscar Kulling's excavation | Under Vakkejokk Breccia, Tjäurajokk                  | Early Cambrian | Jan Bergström | 1978-08-08 |
| X00010216a | cf. <i>Palaeophycus tubularis</i> | Oscar Kulling's excavation | Layer under Vakkejokk Breccia, Tjäurajokk            | Early Cambrian | Jan Bergström | 1978-08-08 |
| X00010216b | <i>Planolites montanus</i>        | Oscar Kulling's excavation | Layer under Vakkejokk Breccia, Tjäurajokk            | Early Cambrian | Jan Bergström | 1978-08-08 |
| X00010217  | <i>Treptichnus pedum</i>          | Oscar Kulling's excavation | ?Shale under Vakkejokk Breccia, Tjäurajokk           | Early Cambrian | Jan Bergström | 1978-08-09 |
| X00010218a | <i>Treptichnus pedum</i>          | Oscar Kulling's excavation | Layer under Vakkejokk Breccia, Tjäurajokk            | Early Cambrian | Jan Bergström | 1978-08-08 |
| X00010218b | <i>Planolites montanus</i>        | Oscar Kulling's excavation | Layer under Vakkejokk Breccia, Tjäurajokk            | Early Cambrian | Jan Bergström | 1978-08-08 |
| X00010219  | <i>Archaeonassa</i> isp.          | Oscar Kulling's excavation | Directly under Vakkejokk Breccia, Tjäurajokk         | Early Cambrian | Jan Bergström | 1978-08-09 |
| X00010220a | cf. <i>Monomorphichnus</i> isp.   | Oscar Kulling's excavation | Shale under Vakkejokk Breccia, Tjäurajokk            | Early Cambrian | Jan Bergström | 1978-08-09 |
| X00010220b | <i>Treptichnus pedum</i>          | Oscar Kulling's excavation | Shale under Vakkejokk Breccia, Tjäurajokk            | Early Cambrian | Jan Bergström | 1978-08-09 |
| X00010221  | <i>Bergaueria perata</i>          | Oscar Kulling's excavation | Under Vakkejokk Breccia, Tjäurajokk quarry           | Early Cambrian | Jan Bergström | 1978-08-09 |
| X00010222  | <i>Treptichnus pedum</i>          | Oscar Kulling's excavation | Under Vakkejokk Breccia, Tjäurajokk                  | Early Cambrian | Jan Bergström | 1978-08-08 |
| X00010223  | Algae ('vendotaenids')            | Tjäurajokk                 | Under part of middle siltstone                       | Early Cambrian | Jan Bergström | 1978-08-09 |
| X00010224a | <i>Bergaueria perata</i>          | Oscar Kulling's excavation | Under Vakkejokk Breccia, Tjäurajokk                  | Early Cambrian | Jan Bergström | 1978-08-08 |

|            |                                       |                            |                                                                        |                |               |            |
|------------|---------------------------------------|----------------------------|------------------------------------------------------------------------|----------------|---------------|------------|
| X00010224b | <i>Treptichnus pedum</i>              | Oscar Kulling's excavation | Under Vakkejokk Breccia, Tjäurajokk                                    | Early Cambrian | Jan Bergström | 1978-08-08 |
| X00003532  | cf. <i>Palaeophycus tubularis</i>     | Oscar Kulling's excavation | Tjäurajokk                                                             | Early Cambrian | Jan Bergström | 1978-08-08 |
| X00010225a | <i>Bergaueria perata</i>              | Oscar Kulling's excavation | Under Vakkejokk Breccia, Tjäurajokk                                    | Early Cambrian | Jan Bergström | 1978-08-08 |
| X00010225b | <i>Treptichnus pedum</i>              | Oscar Kulling's excavation | Under Vakkejokk Breccia, Tjäurajokk                                    | Early Cambrian | Jan Bergström | 1978-08-08 |
| X00010226  | <i>Bergaueria perata</i>              | Oscar Kulling's excavation | Under Vakkejokk Breccia, Tjäurajokk                                    | Early Cambrian | Jan Bergström | 1978-08-08 |
| X00010227  | <i>Treptichnus pedum</i>              | Oscar Kulling's excavation | Siltstone under Vakkejokk Breccia, Tjäurajokk                          | Early Cambrian | Jan Bergström | 1978-08-09 |
| X00010228a | Radiating and looped burrows          | Oscar Kulling's excavation | Siltstone under Vakkejokk Breccia, Tjäurajokk                          | Early Cambrian | Jan Bergström | 1978-08-08 |
| X00010228b | <i>Treptichnus pedum</i>              | Oscar Kulling's excavation | Siltstone under Vakkejokk Breccia, Tjäurajokk                          | Early Cambrian | Jan Bergström | 1978-08-08 |
| X00010229  | <i>Palaeophycus tubularis</i>         | Oscar Kulling's excavation | Siltstone under Vakkejokk Breccia, Tjäurajokk                          | Early Cambrian | Jan Bergström | 1978-08-09 |
| X00010230  | Radiating and looped burrows          | Oscar Kulling's excavation | Siltstone under Vakkejokk Breccia, Tjäurajokk                          | Early Cambrian | Jan Bergström | 1978-08-09 |
| X00010231  | Rock sample                           | Tjäurajokk                 | Basal conglomerate                                                     | Early Cambrian | Jan Bergström | 1978-08-09 |
| X00010232  | Rock sample                           | Tjäurajokk                 | Vakkejokk Breccia                                                      | Early Cambrian | Jan Bergström | 1978-08-08 |
| X00010233  | <i>Sabellidites cambriensis</i>       | Luobákta                   | Moberg's profile 2, layer 1 (upper part of 'lower siltstone interval') | Early Cambrian | Oscar Kulling | 1958-08-01 |
| X00010234  | <i>Sabellidites cambriensis</i>       | Luobákta                   | Moberg's profile 2, layer 1 (upper part of 'lower siltstone interval') | Early Cambrian | Oscar Kulling | 1958-08-01 |
| X00010298  | ? <i>Platysolenites antiquissimus</i> | Luobákta                   | 'Middle siltstone interval'?                                           | Early Cambrian | Jan Bergström | 1978       |
