# Supplementary material
Source: publisher figshare collection journal article supplement (https://tandf.figshare.com/articles/dataset/_/16635354)

TB2      round      Large mount

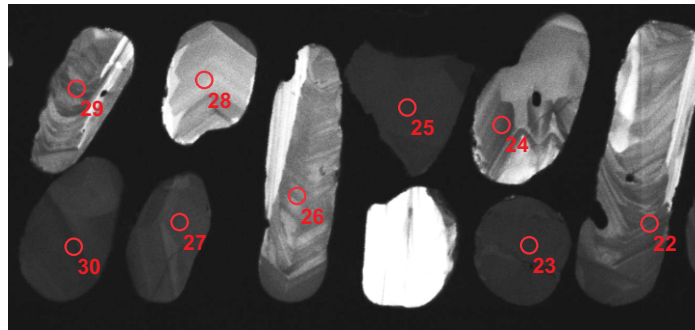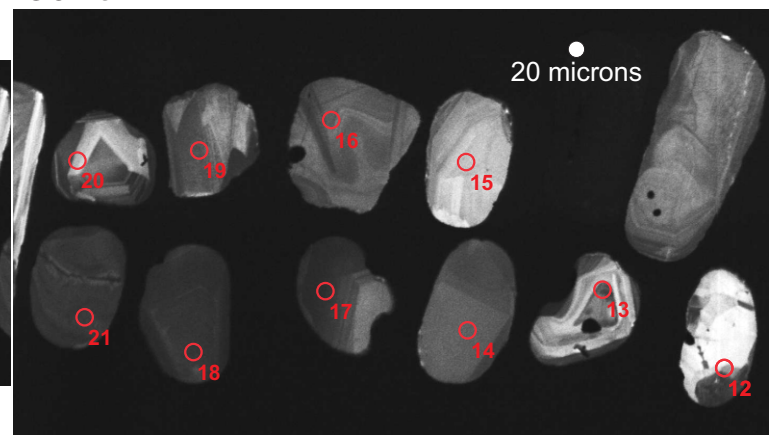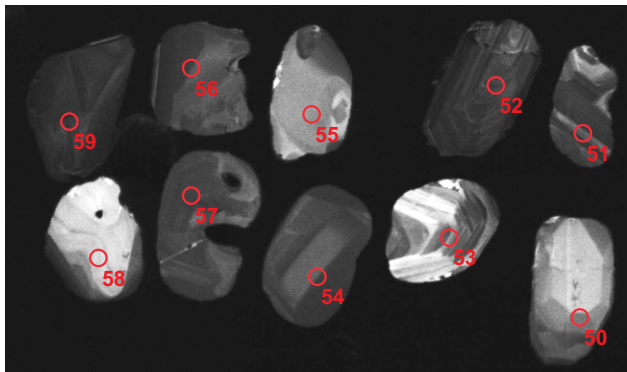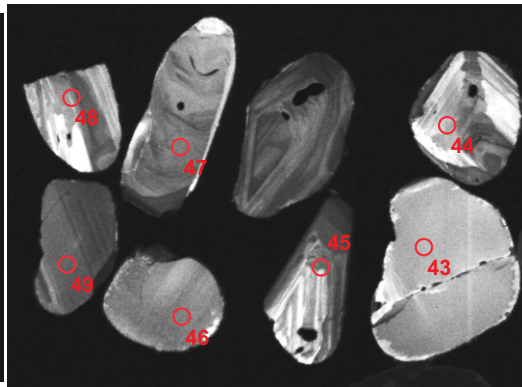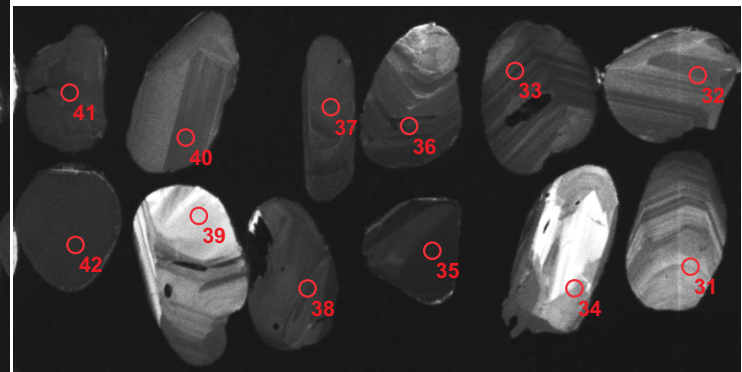

TB2      sharp      Large mount

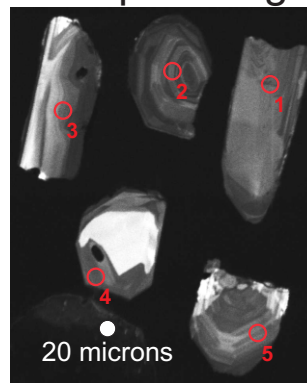

TB2      round      Medium mount

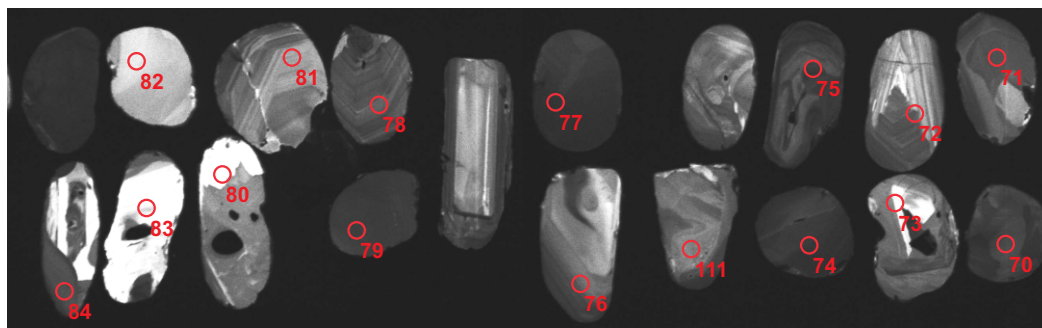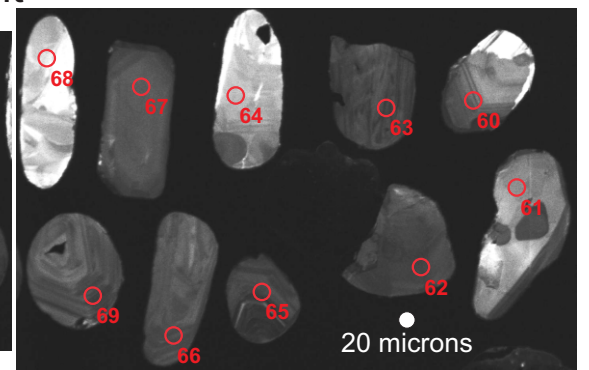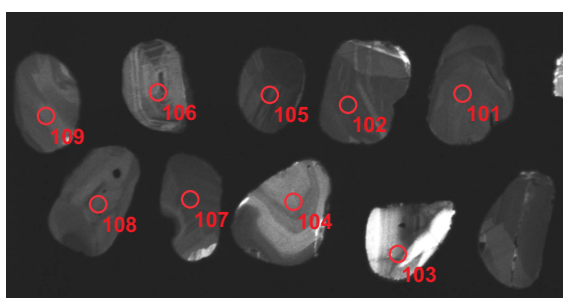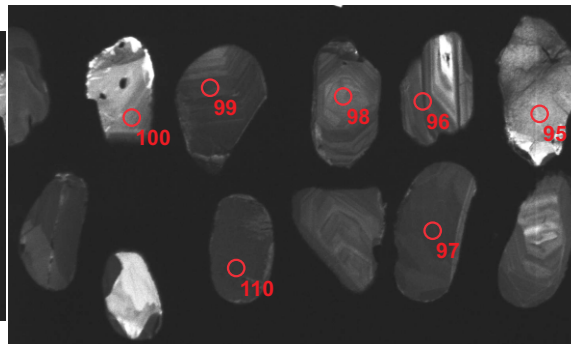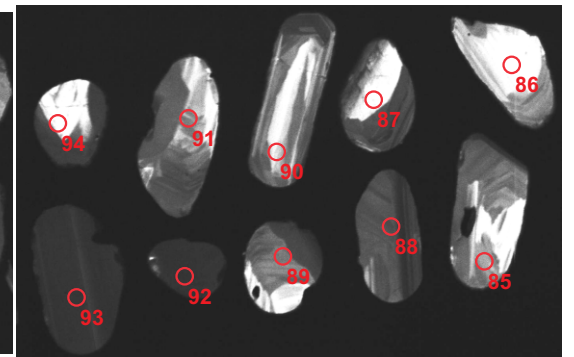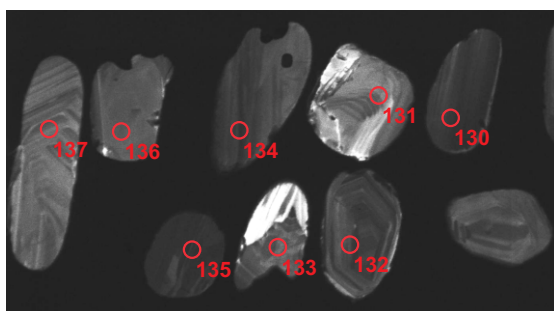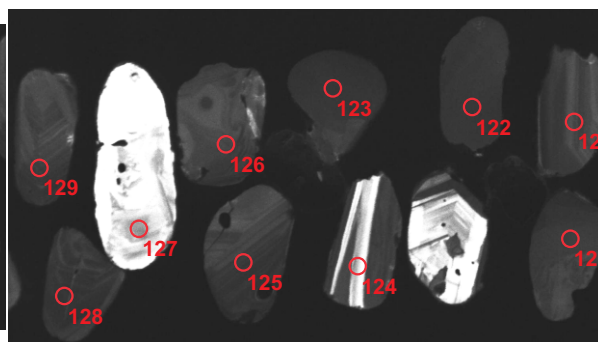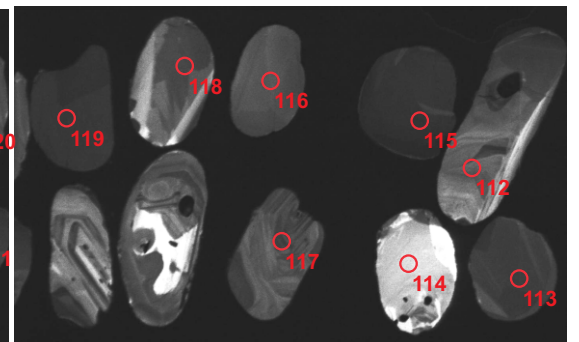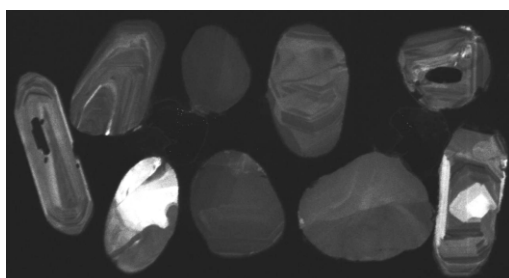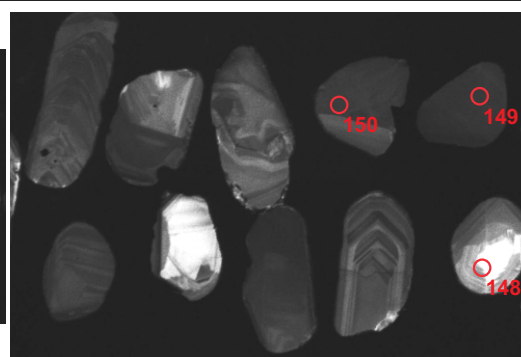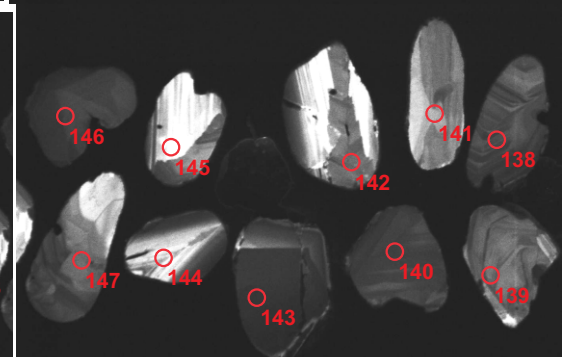

TB2      sharp      Medium mount

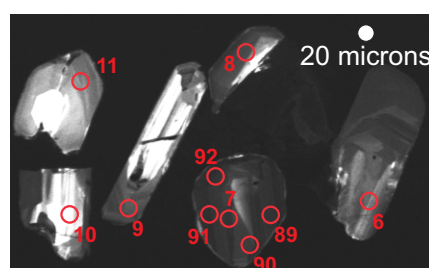

Supplement: Supplementary file 1 [file 1]
